# Supplementary material for: NAT10-dependent N4‐acetylcytidine modification mediates PAN RNA stability, KSHV reactivation, and IFI16-related inflammasome activation
Source: Springer Nature journal article supplement (doi:10.1038/s41467-023-42135-3), 2023-10-10
Supplement: MOESM1 [file 41467_2023_42135_MOESM1_ESM.pdf]

## Supplementary Information

### **NAT10-dependent *N*<sup>4</sup>-acetylcytidine modification mediates PAN RNA stability, KSHV reactivation, and IFI16-related inflammasome activation**

Qin Yan, <sup>1, 2, 3, 4 †</sup> Jing Zhou, <sup>2 †</sup> Ziyu Wang, <sup>2 †</sup> Xiangya Ding, <sup>1 †</sup> Xinyue Ma, <sup>2</sup> Wan Li, <sup>2, 3, 4</sup> Xuemei Jia, <sup>1 \*</sup> Shou-Jiang Gao, <sup>5</sup> and Chun Lu <sup>1, 2, 3, 4 \*</sup>

<sup>1</sup> Department of Gynecology, Women's Hospital of Nanjing Medical University, Nanjing Maternity and Child Health Care Hospital, Nanjing Medical University, Nanjing 210004, P. R. China

<sup>2</sup> Department of Microbiology, Nanjing Medical University, Nanjing 211166, P. R. China

<sup>3</sup> Changzhou Medical Center, Nanjing Medical University, Nanjing 211166, P. R. China

<sup>4</sup> Key Laboratory of Pathogen Biology of Jiangsu Province, Nanjing Medical University, Nanjing 211166, P. R. China

<sup>5</sup> Tumor Virology Program, UPMC Hillman Cancer Center, and Department of Microbiology and Molecular Genetics, University of Pittsburgh, Pittsburgh, PA 15232, USA

† These authors contributed equally to this work

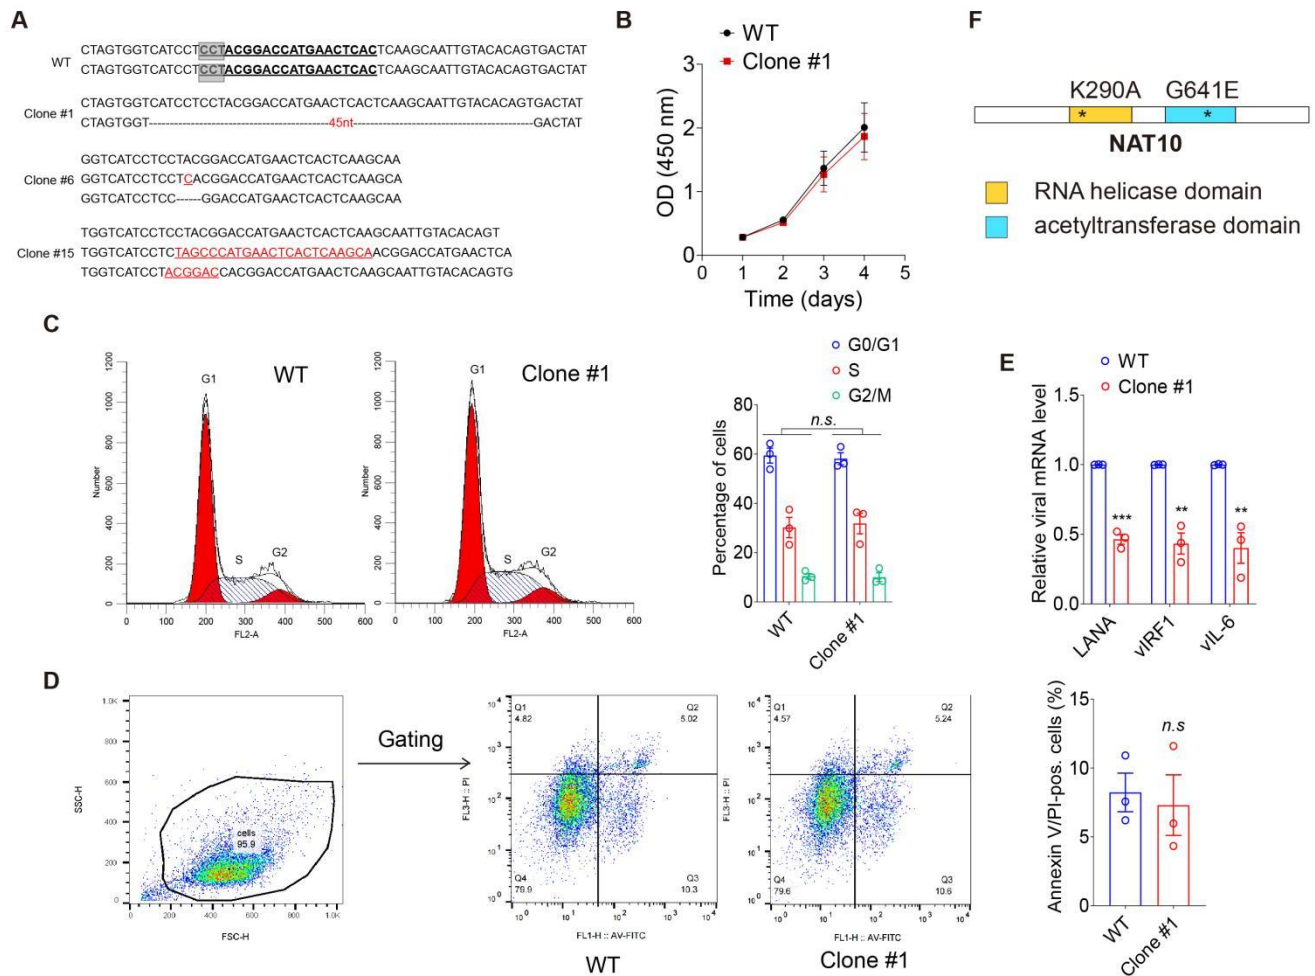

**Supplementary Figure 1. Generation of NAT10 knockdown cells based on CRISPR/Cas9 editing technology.**

**(A).** Diagram of the CRISPR-targeted genomic exon 5 region of NAT10 in iSLK-KSHV cells (**WT**) and three CRISPR-Cas9 clones. The mutated sequences of CRISPR Clones #1, #6, and #15 were shown. The Cas9 PAM (5'-NGG-3') was shown in grey boxes, while the indels and substitutions were shown in red. The sequences targeted by the gRNAs were marked underlined and bolded. Unless otherwise specified, the NAT10<sup>+/-</sup> clones used in this study was Clone #1.

**(B).** CCK8 assays were performed with cells shown in Clone #1 on days 1, 2, 3 and 4. Data were analyzed by two-way ANOVA versus the WT group.

**(C).** Cell cycle assays were performed with cells shown in Clone #1. *n.s.*, not significant by two-sided *t* test.

**(D).** Cell apoptosis assays were performed with cells shown in Clone #1. Gating strategy is shown in the left lane. *n.s.*, not significant by two-sided *t* test.

**(E).** Viral transcripts were quantized by RT-qPCR in NAT10<sup>+/+</sup> (**WT**) or NAT10<sup>+/-</sup> (**Clone #1**) cells.

**\*\***,  $P < 0.01$  and **\*\*\***,  $P < 0.001$  by two-sided *t* test.

**(F).** Schematic illustration of NAT10 functional domains and point mutations.

Data represent mean  $\pm$  SEM from  $n = 3$  biological replicates shown as points. Source data are provided in a Source data file.

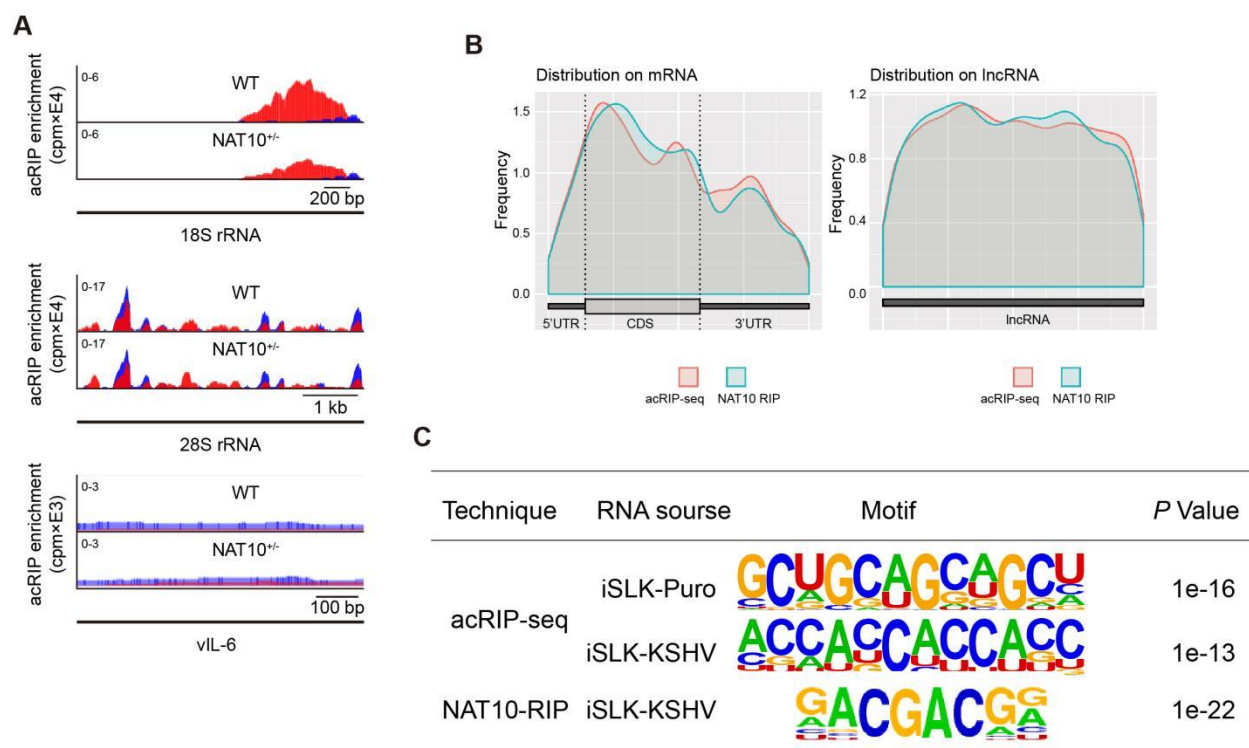

**Supplementary Figure 2. Mappings and motifs of ac<sup>4</sup>C peaks and NAT10-binding sites.**

**(A).** ac<sup>4</sup>C peaks in 18S rRNA, 28S rRNA and KSHV vIL-6 transcript were compared between iSLK-KSHV cells with (**NAT10<sup>+/-</sup>**) or without (**WT**) NAT10 knockdown by acRIP-seq. Input and acRIP reads are marked as blue and red, respectively.

**(B).** Metagene analysis of the distribution of acRIP-seq-mapped ac<sup>4</sup>C sites and RIP-seq-mapped NAT10-bound RNA sites in induced iSLK-KSHV cells, across the untranslated regions (UTRs) and coding regions (CDS) of cellular transcripts (left lane) or lncRNAs (right lane).

**(C).** Enriched sequence motifs in ac<sup>4</sup>C peaks (**acRIP-seq**, upper lane) and NAT10-binding sites (**NAT10-RIP**, lower lane).

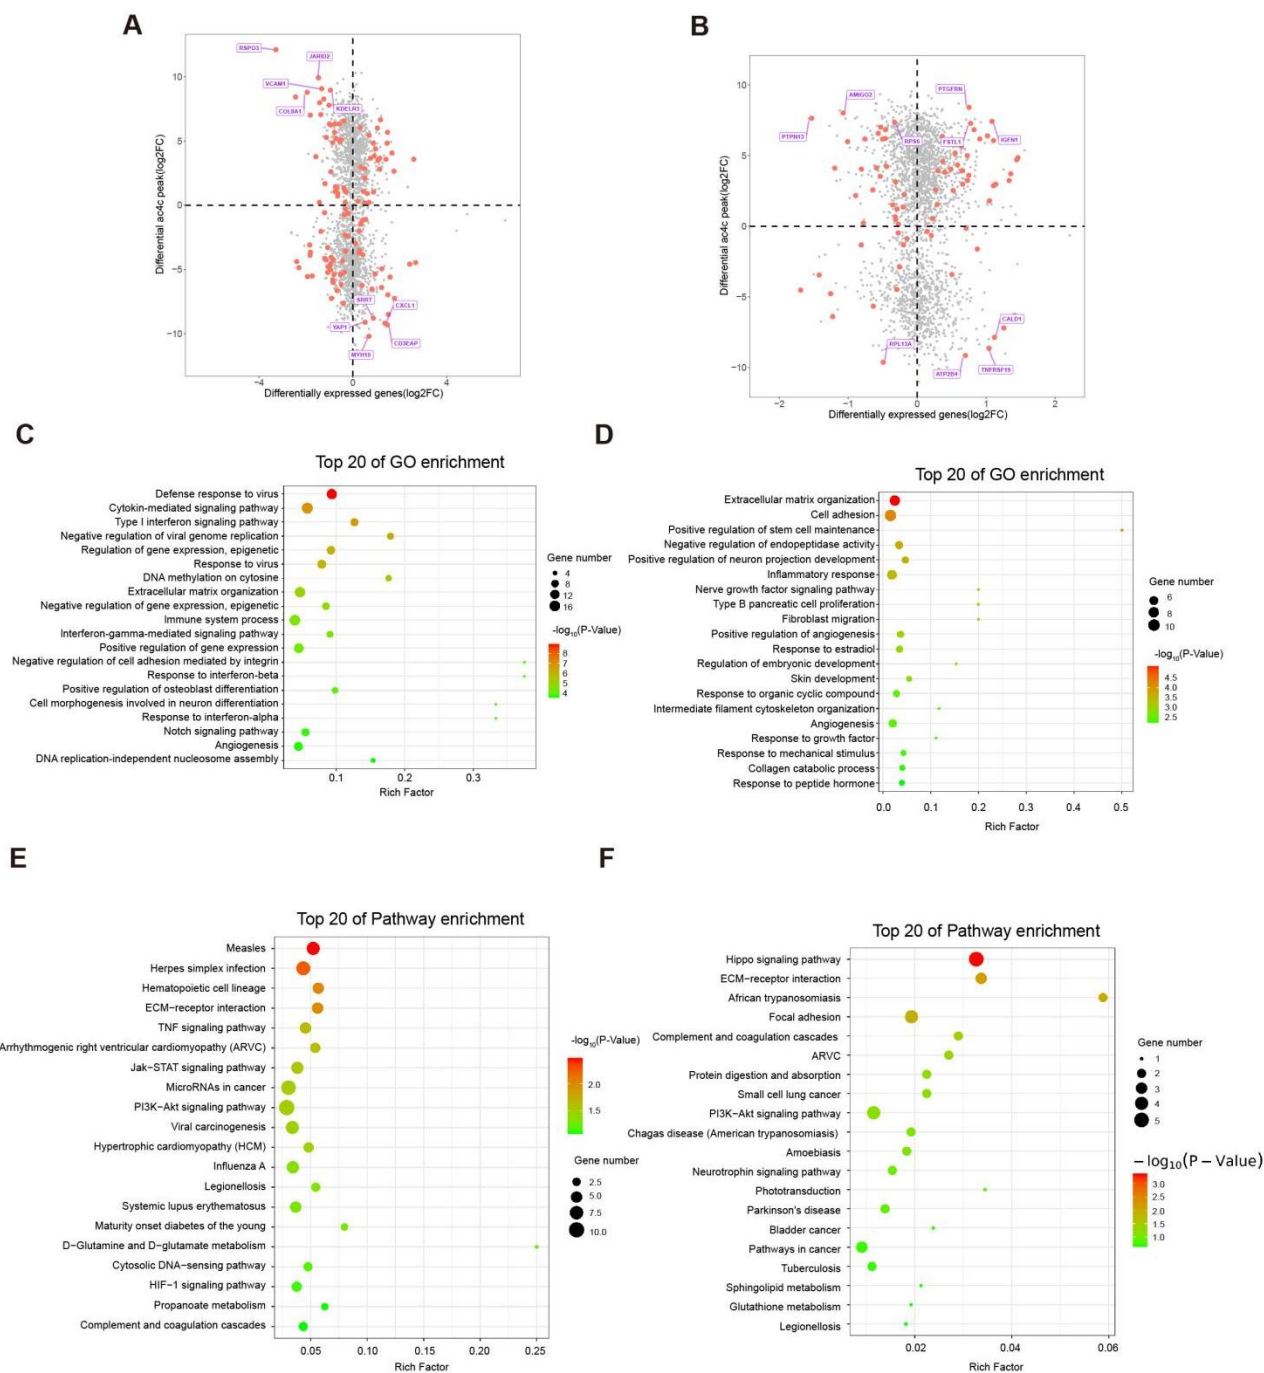

**Supplementary Figure 3. GO and KEGG enrichment analysis of cellular ac<sup>4</sup>C mRNA regulated by KSHV and NAT10.**

**(A-B).** Volcano plots of top 10 differential mRNAs in iSLK-Puro and iSLK-KSHV cells (**A**), or in NAT10<sup>+/+</sup> and NAT10<sup>+/-</sup> iSLK-KSHV cells (**B**).

**(C-D).** Top 20 GO enrichment of dysregulated mRNAs in iSLK-Puro and iSLK-KSHV cells (**C**), or in NAT10<sup>+/+</sup> and NAT10<sup>+/-</sup> iSLK-KSHV cells (**D**).

**(E-F).** Top 20 KEGG pathways enrichment of dysregulated mRNAs in iSLK-Puro and iSLK-KSHV cells (**E**), or in NAT10<sup>+/+</sup> and NAT10<sup>+/-</sup> iSLK-KSHV cells (**F**).

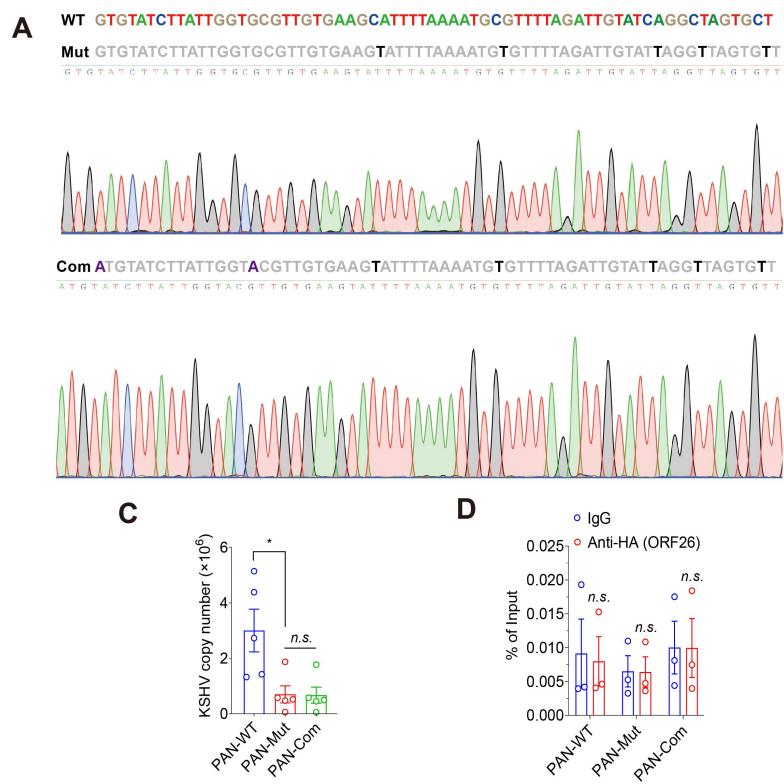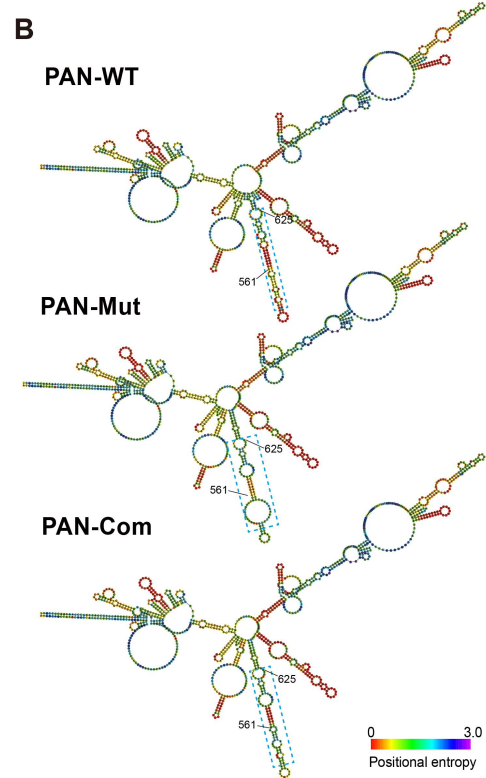

#### Supplementary Figure 4. The structure prediction of PAN RNA with mutation.

**(A).** The ac<sup>4</sup>C sites in wild type (**WT**) PAN RNA (561 to 625 nt) were mutated from C (marked as blue) to T (marked as black) to obtain ac<sup>4</sup>C mutant PAN (**Mut**), while G561 and G576 in ac<sup>4</sup>C mutant PAN were mutated to A576 and A561 (marked as orange) to generate compensated mutant PAN (**Com**). The mutation sites were verified by Sanger sequencing (below).

**(B).** WT PAN (**PAN-WT**), ac<sup>4</sup>C mutant PAN (**PAN-Mut**) and compensated mutant PAN (**PAN-Com**) were submitted to the RNAfold web server (<http://rna.tbi.univie.ac.at/cgi-bin/RNAWebSuite/RNAfold.cgi>) for structure analysis. The blue dashed box indicates the mutation region.

**(C).** iSLK-KSHV cells with WT PAN (**PAN-WT**), ac<sup>4</sup>C mutant PAN (**PAN-Mut**) and compensated mutant PAN (**PAN-Com**) were induced by doxycycline for 72 h. Real-time DNA-PCR was then performed to detect viral copy number by the assessment of ORF26. \*,  $P < 0.05$  by one-way ANOVA. *n.s.*, not significant.

**(D).** The iSLK-Puro cells transduced by HA-tagged KSHV ORF26 were subjected to the anti-HA (ORF26) or immunoglobulin G (IgG) RNA immunoprecipitation, and the WT PAN (**PAN-WT**), ac<sup>4</sup>C mutant PAN (**PAN-Mut**) and compensated mutant PAN (**PAN-Com**) were examined by RT-qPCR. *n.s.*, not significant by two-sided *t* test versus the IgG group.

Data represent mean  $\pm$  SEM from  $n = 3$  (**D**) or  $n = 5$  (**C**) biological replicates shown as points.

Source data are provided in a Source data file.

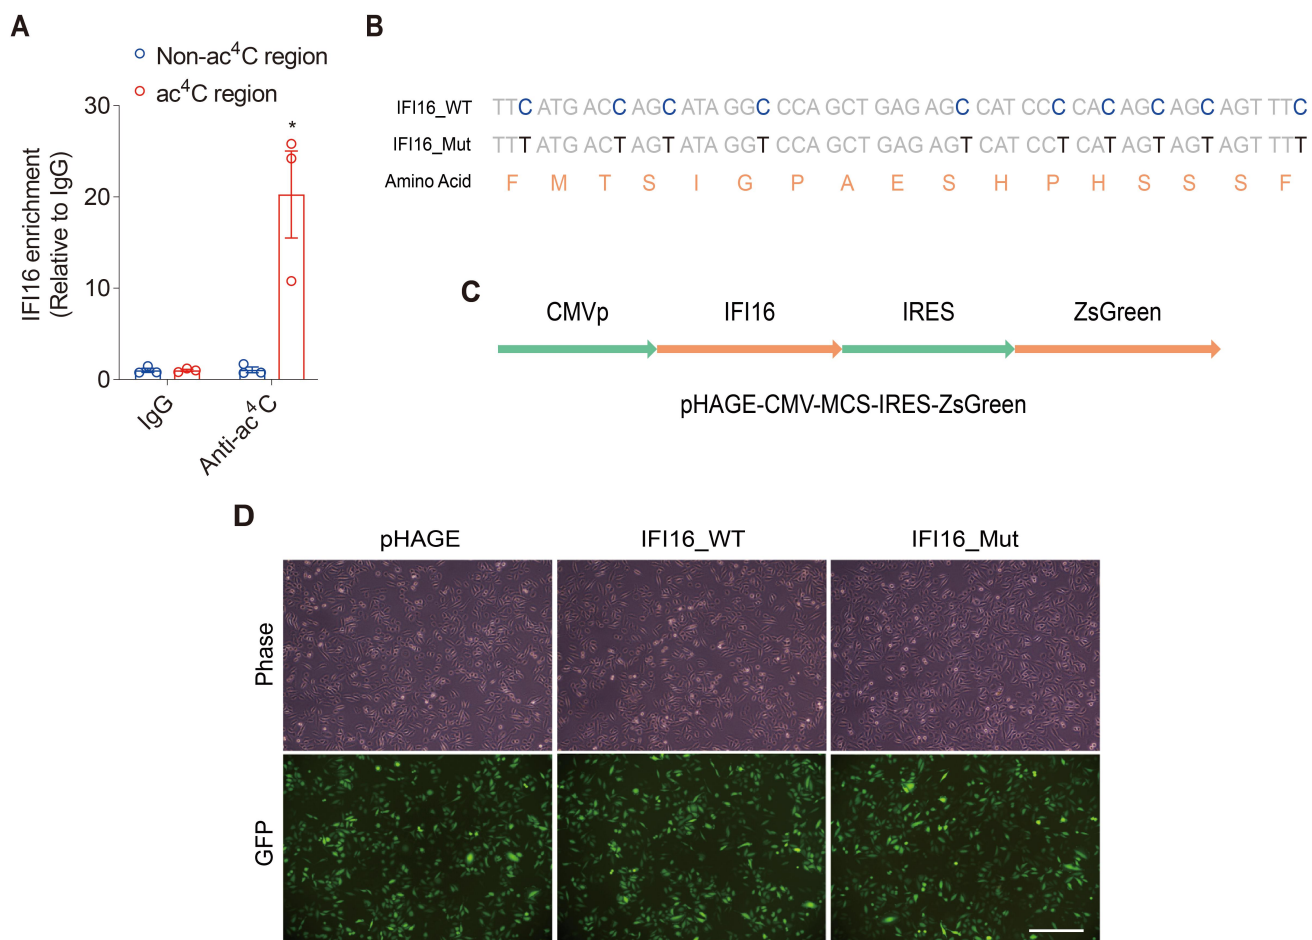

### **Supplementary Figure 5. Construction of IFI16 mutant into pHAGE plasmid.**

**(A).** RNA immunoprecipitation was performed with anti-ac<sup>4</sup>C antibody (**Anti-ac<sup>4</sup>C**) or IgG (**IgG**), and subsequent RT-qPCR was used to detect ac<sup>4</sup>C enrichment on acetylated (**ac<sup>4</sup>C region**) or non-acetylated (**Non-ac<sup>4</sup>C region**) regions of IFI16 mRNA. \*,  $P < 0.05$  by two-sided  $t$  test versus the non-ac<sup>4</sup>C region.

**(B).** ac<sup>4</sup>C sites in IFI16 mRNA (exon 9) were mutated from C to T without changing its amino acids sequence in an internal ribozyme entry site (IRES).

**(C).** IFI16 coding sequence was constructed into an IRES based plasmid.

**(D).** The fluorescent intensity was showed after IFI16\_WT (**IFI16\_WT**) and IFI16\_Mut (**IFI16\_Mut**) or their control (**pHAGE**) plasmids transfection in HEK293T cells. Scar bars, 40  $\mu$ m.

Data represent mean  $\pm$  SEM from  $n = 3$  (**A**) biological replicates shown as points. Source data are provided in a Source data file.

**Supplementary Table 1.** Oligonucleotides used for RT-qPCR, PCR and CRISPR/Cas9

| <b>RT-qPCR primers</b>           |                                 |
|----------------------------------|---------------------------------|
| TGGCGAGGTCAAGCTTAACTTC           | KSHV ORF57-F                    |
| CCCCTGGCCTGTAGTATTCCA            | KSHV ORF57-R                    |
| ATATGTCGCAGGCCGAATAC             | KSHV ORF65-F                    |
| CCACCCATCCTCCTCAGATA             | KSHV ORF65-R                    |
| CGGATTGAGTGTAATCGGGC             | KSHV PAN-F (Also for ac4C-RIP)  |
| TGCTTCACAACGCACCAATAAG           | KSHV PAN-R (Also for ac4C-RIP)  |
| CCGAGGACGAAATGGAAGTG             | KSHV LANA (ORF73)-F             |
| GGTGATGTTCTGAGTACATAGCGG         | KSHV LANA (ORF73)-R             |
| AAAGCGTCCAGGCCACACAGA            | KSHV K8.1-F                     |
| GGCAGAAAATGGCACACGGTTAC          | KSHV K8.1-R                     |
| AGCCGAAAGGATTCCACCAT             | ORF26-F                         |
| GCTGCGGCACGACCAT                 | ORF26-R                         |
| TCCAGCAGTTTCTTCACCA              | IFI16-F                         |
| GTCTGGAAAATGACTCCC               | IFI16-R                         |
| GTATTCTAGAGCCCGCTGCTA            | vIL-6-F                         |
| TTAAATCCTATTAACCCGCAG            | vIL-6-R                         |
| GTCTCTGCGCCATTCAAAC              | vIRF1-F                         |
| CCGGACACGACAATAAGAA              | vIRF1-R                         |
| CAACAACCTGCATGGATTGAG            | POLR2H-1F                       |
| AAGGCTAGCTTCTTCATCAGGA           | POLR2H-1R                       |
| TTTTCCCACATTGGCCTGAGAGC          | PAN-F (non-acetylated region)   |
| TGAATCCAATGCAATAACCCGCAAG        | PAN-R (non-acetylated region)   |
| ACAAATAAGCATTGATTCTGCAT          | IFI16-F (non-acetylated region) |
| ATCTTTACAGACATAAGTGAGCCT         | IFI16-R (non-acetylated region) |
| <b>PCR primers</b>               |                                 |
| TTGCATGACCAGCCCTTTCTAACGCCCCCTTC | Validation of CRISPR editing-F  |
| TAGGCATACTCATGGACCCTG            | Validation of CRISPR editing-R  |
| CGCTTCACCTATGGATTTTGTGCTC        | Validation of PAN mutant-F      |
| AGCTCTAGGCACGTAAATTGTCA          | Validation of PAN mutant-R      |

|                                                                                                                                       |                                                 |
|---------------------------------------------------------------------------------------------------------------------------------------|-------------------------------------------------|
| GCCACTTTGCCCTAAATGTGACAATCTGGATGTGTA<br>TCTTATTGGTGCGTTGTGAAGTATTTTAAAATGTGTT<br>TTAGATTGTATTAGGTTAGTGTTAGGATGACGACGAT<br>AAGTAGGG    | Amplification of PAN ac <sup>4</sup> C mutant-F |
| CTTACACTGGAAAAATAAACACACCATTACAACACT<br>AACCTAATACAATCTAAAACACATTTTAAAATACTTCA<br>CAACGCACCAATAAGATACACACAACCAATTAACCA<br>ATTCTGATTAG | Amplification of PAN ac <sup>4</sup> C mutant-R |
| GCCACTTTGCCCTAAATGTGACAATCTGGATATGTA<br>TCTTATTGGTACGTTGTGAAGTATTTTAAAATGTGTT<br>TTAGATTGTATTAGGTTAGTGTTAGGATGACGACGAT<br>AAGTAGGG    | Amplification of PAN compensatory mutant-F      |
| CTTACACTGGAAAAATAAACACACCATTACAACACT<br>AACCTAATACAATCTAAAACACATTTTAAAATACTTCA<br>CAACGTACCAATAAGATACATACAACCAATTAACCA<br>TTCTGATTAG  | Amplification of PAN compensatory mutant-R      |
| <b>CRISPR guide RNAs for cloning into LentiCRISPRv2</b>                                                                               |                                                 |
| CCTACGGACCATGAACTCAC                                                                                                                  | NAT10                                           |

F, Forward; R, Reverse
